# Supplementary material
Source: Atypon-hosted journal article supplement (doi:10.1287/ijoc.2023.0521)

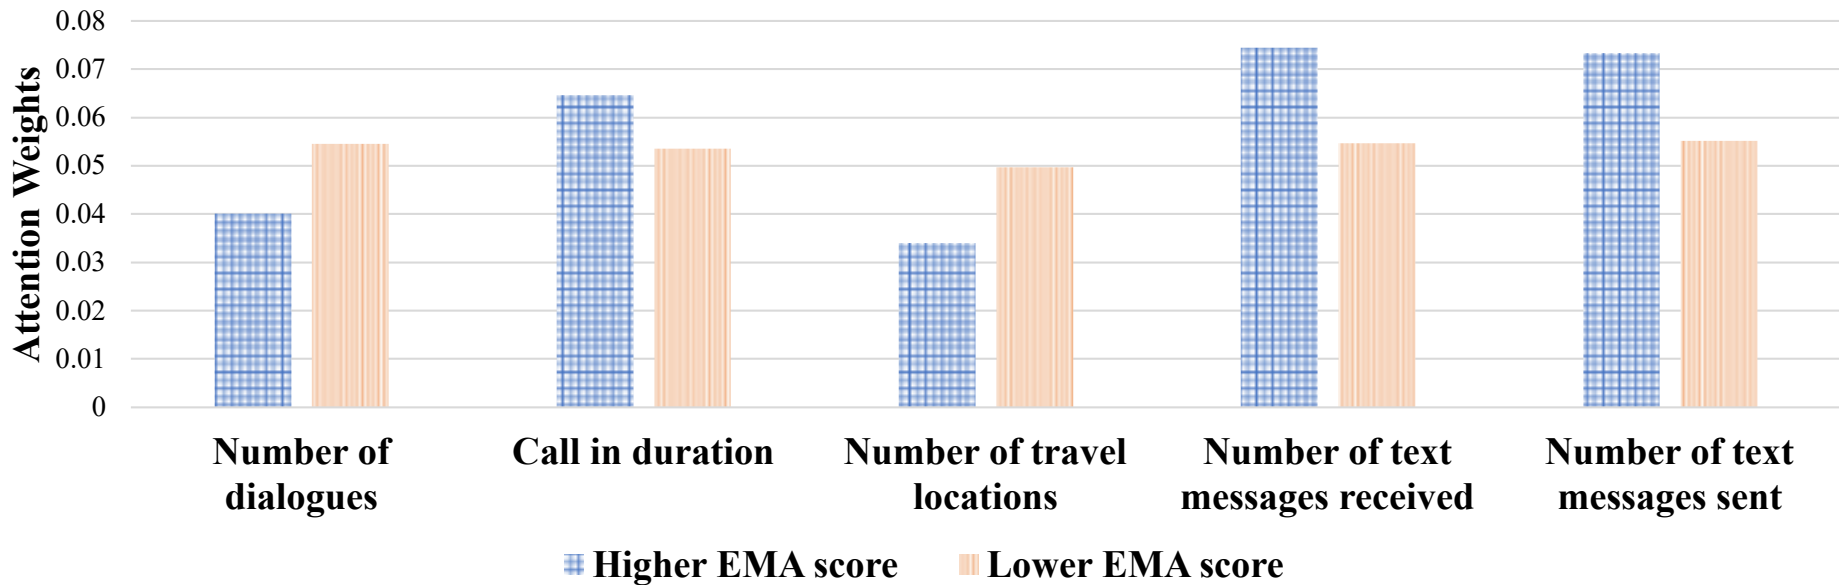

Supplement: ijoc.2023.0521.cd.zip [file Fig7.pdf › 2023.0521-main/results/Fig7.pdf]
